# Supplementary material for: IgM monoclonal gammopathies of clinical significance: diagnosis and management
Source: PubMed Central journal article supplement — Haematologica. 2022 Jun 30;107(9):2037–50. doi: 10.3324/haematol.2022.280953 (PMC9425303; doi:10.3324/haematol.2022.280953), 2022-06-30
Supplement: 2022_280953_KHWAJA_SUPPL.pdf [file 2022_280953_KHWAJA_SUPPL.pdf]

# IgM monoclonal gammopathies of clinical significance: diagnosis and management

Jahanzaib Khwaja,<sup>1</sup> Shirley D'Sa,<sup>1</sup> Monique C. Minnema,<sup>2</sup> Marie José Kersten,<sup>3</sup>  
Ashutosh Wechalekar<sup>1</sup> and Josephine M.I. Vos<sup>3</sup>

<sup>1</sup>University College London Hospital, London, UK; <sup>2</sup>Department of Hematology, University Medical Center Utrecht, University Utrecht, Utrecht, the Netherlands and <sup>3</sup>Department of Hematology, Amsterdam University Medical Centers, University of Amsterdam, Cancer Center Amsterdam and Lymphoma and Myeloma Center Amsterdam, Amsterdam, the Netherlands

**Correspondence:** J.M. Vos  
[j.m.i.vos@amsterdamumc.nl](mailto:j.m.i.vos@amsterdamumc.nl)

**Received:** March 9, 2022.

**Accepted:** June 16, 2022.

**Prepublished:** June 30, 2022.

<https://doi.org/10.3324/haematol.2022.280953>

©2022 Ferrata Storti Foundation

Published under a CC-BY-NC license

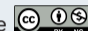

## Supplementary data

**Supplementary table 1. Summary of CAD treatment considerations**

| Frontline                                 |                 |                                                                                                                                                              |
|-------------------------------------------|-----------------|--------------------------------------------------------------------------------------------------------------------------------------------------------------|
| Treatment                                 | Target          | Considerations                                                                                                                                               |
| Rituximab (R)                             | LPL             | Time of onset is weeks<br>375mg/m <sup>2</sup> for 4 weeks                                                                                                   |
| R-Bendamustine                            | LPL             | Consider if fit, 4 cycles                                                                                                                                    |
| R-Fludarabine                             | LPL             | Risk of secondary malignancy, so only selectively use                                                                                                        |
| Relapse/Novel                             |                 |                                                                                                                                                              |
| Treatment                                 | Target          | Considerations                                                                                                                                               |
| Bortezomib ± R                            | LPL/Plasma cell | 1.3 mg/m <sup>2</sup> subcutaneous, caution dose in those with neuropathy                                                                                    |
| Ibrutinib                                 | LPL             | Case report use <sup>23</sup>                                                                                                                                |
| Daratumumab                               | LPL/Plasma cell | Case report use <sup>24</sup> .<br>16 mg/kg weekly (weeks 1-6), 2-weekly (weeks 9-24) and 4-weekly thereafter                                                |
| Eculizumab (C5 inhibitor)                 | Complement      | Time of onset is days, may be useful in acute severe intravascular haemolysis. No effect on extravascular haemolysis                                         |
| Sutimlimab (C1s inhibitor)                | Complement      | Phase 3 open-label, single arm (NCT03347396, CARDINAL), completed recruitment<br>Phase 3 randomised placebo-controlled clinical trial (CADENZA, NCT03347422) |
| Pegcetacoplan (C3b inhibitor)             | Complement      | Phase 3 clinical trial (NCT05096403) for those received prior Rituximab. Twice-weekly subcutaneous 1080-mg vs placebo                                        |
| Iptacopan (Complement factor B inhibitor) | Complement      | Phase 2 clinical trial (NCT05086744) for relapsed patients. 200mg capsule BD                                                                                 |
| Cinryze (C1 esterase inhibitor)           | Complement      | Phase 2 clinical trial (2012-003710-13/NL)                                                                                                                   |
